# Supplementary material for: A molecular probe for recognizing the size of hydrophobic cavities based on near-infrared absorbing diradical–PtII complexes
Source: Royal Society of Chemistry journal article supplement (doi:10.1039/c3cc41468j), 2013-01-01
Supplement: c3cc41468j.pdf [file c3cc41468j.pdf]

Electronic Supplementary Information

Paper Ref: C3CC41468J - Chemical Communications

**A molecular probe for recognizing the size of hydrophobic cavities based on near-infrared absorbing diradical–Pt<sup>II</sup> complexes**

Kousaku Tamura, Atsuko Masuya, Hitoshi Hoshino and Nobuhiko Iki\*

*Graduate School of Environmental Studies, Tohoku University, 6-6-07, Aramaki-Aoba, Aoba-ku, Sendai, 980-8579, Japan*

**Contents**

---

**Experimental details**

**Supplementary data**

Continuous variation plots                      Figures S1 and S3

Estimation of the size of the complexes      Figure S2

---

Corresponding Author

\*Fax: +81-22-795-7293; E-mail: iki@m.tohoku.ac.jp

## Experimental Details

### Material

Pt<sup>II</sup>-DBA was synthesized according to a method as described in the literature<sup>1</sup>. Human serum albumin (MW 66 kDa) and  $\alpha$ -chymotrypsin, from bovine pancreas (MW 25 kDa) were purchased from Sigma-Aldrich.  $\beta$ - And  $\gamma$ -cyclodextrin (CD) were purchased from Wako Pure Chemical Co., Ltd (Osaka). All reagents were used without further purification.

### Equipment

<sup>1</sup>H NMR spectra were measured on a Bruker Biospin DPX-400 (400 MHz) using D<sub>2</sub>O as solvents and (3-trimethylsilyl)propanesulfonic acid sodium salt (DSS) as an external standard. Absorption spectra were measured on a SHIMADZU UV-1800 spectrophotometer. The cyclic voltammetric measurements were performed with a Hokuto Denko HAB-151 potentiostat/galvanostat using a glassy carbon working electrode, an Ag/AgCl reference electrode, and a Pt counter electrode in aqueous solution containing 0.2 M Na<sub>2</sub>HPO<sub>4</sub> as the supporting electrolyte and NaOH to adjust pH under N<sub>2</sub>. pH of the solutions were measured by using a TOA-DKK HM-25R pH meter equipped with a GST-5731C combined electrode.

## Supporting Data

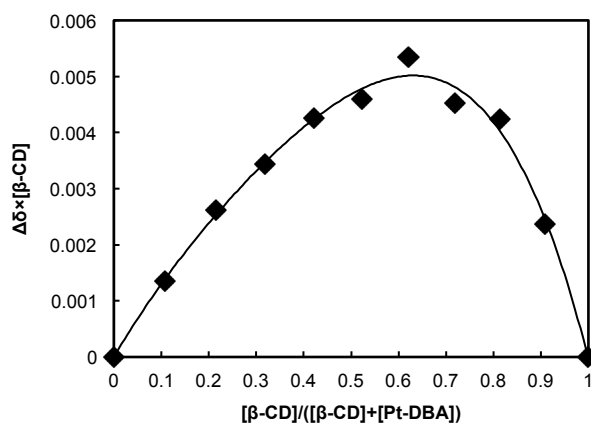

**Fig. S1** Continuous variation plot of Pt<sup>II</sup>-DBA/ $\beta$ -CD system using <sup>1</sup>H NMR chemical shift of H3 as a probe. [Pt<sup>II</sup>-DBA] + [ $\beta$ -CD] = 5.0 mM, pD 12.60.

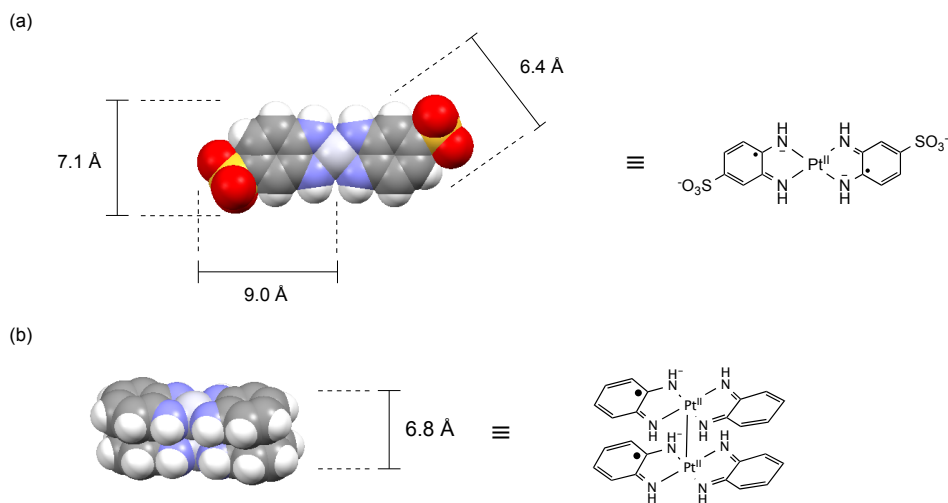

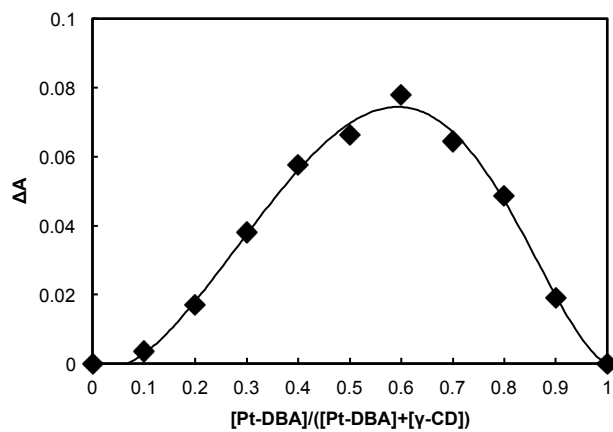

**Fig. S3** Continuous variation plot of  $\text{Pt}^{\text{II}}$ -DBA/ $\gamma$ -CD system using absorbance at 850 nm.  
 $[\text{Pt}^{\text{II}}\text{-DBA}] + [\gamma\text{-CD}] = 1.0 \times 10^{-4} \text{ M}$ , pH 12.25.

## References

1. K. Tamura, A. Masuya, N. Iki, Y. Ohba, S. Yamauchi and H. Hoshino, *Inorg. Chim. Acta*, 2012, **378**, 81.
2. A. Masuya, N. Iki, C. Kabuto, Y. Ohba, S. Yamauchi and H. Hoshino, *Eur. J. Inorg. Chem.*, 2010, **22**, 3458.
3. Y. Konno and N. Matsushita, *Bull. Chem. Soc. Jpn.*, 2006, **79**, 1046.
4. Structure visualization program developed by the Cambridge Crystallographic Data Centre available at [http://www.ccdc.cam.ac.uk/free\\_services/mercury/](http://www.ccdc.cam.ac.uk/free_services/mercury/) .
